# Supplementary material for: Use of Genetic Tests among Neurologists and Psychiatrists: Knowledge, Attitudes, Behaviors, and Needs for Training
Source: Springer Nature journal article supplement (doi:10.1007/s10897-013-9624-0), 2013-06-20
Supplement: MOESM1 [file 10897_2013_9624_MOESM1_ESM.docx]

**Appendix: Sample Survey Questions**

1. How many times in the past six months have you ordered genetic testing for patients?

- None
- 1-5 times
- 6-10 times
- 11-15 times
- 16-20 times
- More than 20 times

1. In the past six months, how many times have your patients asked about genetic testing?

- None
- 1-5 times
- 6-10 times
- 11-15 times
- 16-20 times
- More than 20 times

1. Do you have a geneticist/genetic counselor to whom you can refer patients?

- Yes
- No

1. Have you ever received commercial advertisements from genetic testing laboratories?

- Yes
- No

1. Have any of your patients ever:

5a. Declined genetic testing?

- Yes
- No

5b. Asked you not to document genetic information?

- Yes
- No

5c. Had genetic testing under a pseudonym?

- Yes
- No

1. Have patients ever inquired about direct to consumer genetic testing (e.g., 23andme, Knome, etc.)?

- Yes
- No

1. On a scale of 1-5 (with 1 very poor and 5 very good), how would you rate your knowledge of genetics?

7a. Personal Knowledge of Genetics

- 1 (Very poor)
- 2
- 3
- 4
- 5 (Very good)

1. To what extent do you agree or disagree with the following statements?

8a. I am confident in my knowledge of how to order/where to send tests.

- Strongly Disagree
- Somewhat Disagree
- Neither Agree nor Disagree
- Somewhat Agree
- Strongly Agree

8b. My patients have a low understanding of genetics.

- Strongly Disagree
- Somewhat Disagree
- Neither Agree nor Disagree
- Somewhat Agree
- Strongly Agree

8c. Genetic tests can psychologically harm patients.

- Strongly Disagree
- Somewhat Disagree
- Neither Agree nor Disagree
- Somewhat Agree
- Strongly Agree

1. Do you feel you could use more training in:

9a. How to interpret test results?

- Yes
- No

1. On a scale of 1-5 (with 1 None and 5 High), to what degree would the following facilitate your effective use of genetic testing?

10a. Better understanding of statistics

- 1 (None)
- 2 (Very Low)
- 3 (Low)
- 4 (Moderate)
- 5 (High)

1. Compared with current practices in neurology, do you think genetic testing should be performed...?

- More often
- Less often
- About the same
